# Supplementary material for: Validation of Guiding Needle Placement Using Registered Ultrasound Imaging for Gynecologic Brachytherapy in a Simulated Pelvic Phantom
Source: Research Square preprint supplement (doi:10.21203/rs.3.rs-6132329/v1), 2025-03-12
Supplement: Supplementary file 1 [file ad6f6627598dbefbf56ab2a5.docx]

CT：

Needle 1

The needle trajectories in the registered US-CT： R1: (55.0, 42.5, 83.0) R2: (60.0, 42.0, 78.0) R3: (65.0, 41.5, 73.0) R4: (70.0, 41.0, 68.0) R5: (75.0, 40.5, 63.0)

The needle trajectories in the real-time spatial model： P1: (55.0, 43.2, 82.8) P2: (60.0, 42.8, 77.8) P3: (65.0, 42.4, 72.8) P4: (70.0, 42.0, 67.8) P5: (75.0, 41.6, 62.8)

Needle 2

The needle trajectories in the registered US-CT： R1: (53.25, 42.80, 84.50) R2: (58.75, 42.25, 79.25) R3: (63.50, 41.70, 74.50) R4: (68.25, 41.15, 69.75) R5: (73.00, 40.60, 65.00)

The needle trajectories in the real-time spatial model： P1: (53.25, 43.50, 84.30) P2: (58.75, 42.95, 79.05) P3: (63.50, 42.40, 74.30) P4: (68.25, 41.85, 69.55) P5: (73.00, 41.30, 64.80)

Needle 3

The needle trajectories in the registered US-CT： R1: (54.50, 42.85, 83.75) R2: (59.25, 42.30, 78.50) R3: (64.75, 41.75, 73.25) R4: (69.50, 41.20, 68.75) R5: (74.25, 40.65, 64.25)

The needle trajectories in the real-time spatial model： P1: (54.50, 43.55, 83.55) P2: (59.25, 43.00, 78.30) P3: (64.75, 42.45, 73.05) P4: (69.50, 41.90, 68.55) P5: (74.25, 41.35, 64.05)

Needle 4

The needle trajectories in the registered US-CT： R1: (55.75, 42.90, 82.75) R2: (60.25, 42.35, 77.50) R3: (65.50, 41.80, 72.25) R4: (70.75, 41.25, 67.50) R5: (75.25, 40.70, 62.75)

The needle trajectories in the real-time spatial model： P1: (55.75, 43.60, 82.55) P2: (60.25, 43.05, 77.30) P3: (65.50, 42.50, 72.05) P4: (70.75, 41.95, 67.30) P5: (75.25, 41.40, 62.55)

MR:

Needle 1

The needle trajectories in the registered US-MR: R1: (53.25, 42.95, 84.50) R2: (58.75, 42.40, 79.25) R3: (63.50, 41.85, 74.75) R4: (68.25, 41.30, 70.25) R5: (73.75, 40.75, 65.75)

The needle trajectories in the real-time spatial model： P1: (53.25, 43.65, 84.30) P2: (58.75, 43.10, 79.05) P3: (63.50, 42.55, 74.55) P4: (68.25, 42.00, 70.05) P5: (73.75, 41.45, 65.55)

Needle 2

The needle trajectories in the registered US-MR: R1: (52.25, 42.90, 85.50) R2: (57.75, 42.35, 80.25) R3: (62.50, 41.80, 75.75) R4: (67.25, 41.25, 71.25) R5: (72.75, 40.70, 66.75)

The needle trajectories in the real-time spatial model： P1: (52.25, 43.60, 85.30) P2: (57.75, 43.05, 80.05) P3: (62.50, 42.50, 75.55) P4: (67.25, 41.95, 71.05) P5: (72.75, 41.40, 66.55)

Needle 3

The needle trajectories in the registered US-MR: R1: (51.25, 52.90, 85.50) R2: (56.75, 52.35, 80.25) R3: (61.50, 51.80, 75.75) R4: (66.25, 51.25, 71.25) R5: (71.75, 50.70, 66.75)

The needle trajectories in the real-time spatial model： P1: (51.25, 53.60, 85.30) P2: (56.75, 53.05, 80.05) P3: (61.50, 52.50, 75.55) P4: (66.25, 51.95, 71.05) P5: (71.75, 51.40, 66.55)

Needle 4

The needle trajectories in the registered US-MR: R1: (50.25, 62.90, 85.50) R2: (55.75, 62.35, 80.25) R3: (60.50, 61.80, 75.75) R4: (65.25, 61.25, 71.25) R5: (70.75, 60.70, 66.75)

The needle trajectories in the real-time spatial model： P1: (50.25, 63.60, 85.30) P2: (55.75, 63.05, 80.05) P3: (60.50, 62.50, 75.55) P4: (65.25, 61.95, 71.05) P5: (70.75, 61.40, 66.55)
